# Supplementary material for: Iron Transporter Protein Expressions in Children with Celiac Disease
Source: Nutrients. 2021 Feb 27;13(3):776. doi: 10.3390/nu13030776 (PMC7997288; doi:10.3390/nu13030776)
Supplement: Supplementary file 1 [file nutrients-13-00776-s001.pdf]

**Supplementary Table S1.** Specific characteristics of the staining procedures

| Target                       | Antibody                                                                               | Host   | Dilution | Incubation | Secondary antibody                 |
|------------------------------|----------------------------------------------------------------------------------------|--------|----------|------------|------------------------------------|
| Duodenal cytochrome B        | Anti-CYBRD1, HPA014757, Atlas Antibodies, Stockholm, Sweden                            | Rabbit | 1:800    | Overnight  | Bionylated anti-rabbit             |
| Divalent metal transporter 1 | Anti-DMT1, ab55812, Abcam, Cambridge, UK                                               | Rabbit | 1:150    | Overnight  | ImmPRESS peroxidase Anti rabbit Ig |
| Ferroportin                  | SLC40A1 Antibody, PA5-22993, Thermo Fisher Scientific, Rockford, USA                   | Rabbit | 1:700    | Overnight  | ImmPRESS peroxidase Anti rabbit Ig |
| Hephaestin                   | Hephaestin (L-20), sc-49969, Santa Cruz Biotechnology, Dallas, USA                     | Goat   | 1:400    | Overnight  | Bionylated anti-goat antibody      |
| Transferrin receptor 1       | Transferrin Receptor / CD71 Antibody (H68.4), Invitrogen, Thermo Fisher, Rockford, USA | Mouse  | 1:150    | Overnight  | ImmPRESS peroxidase Anti rabbit Ig |

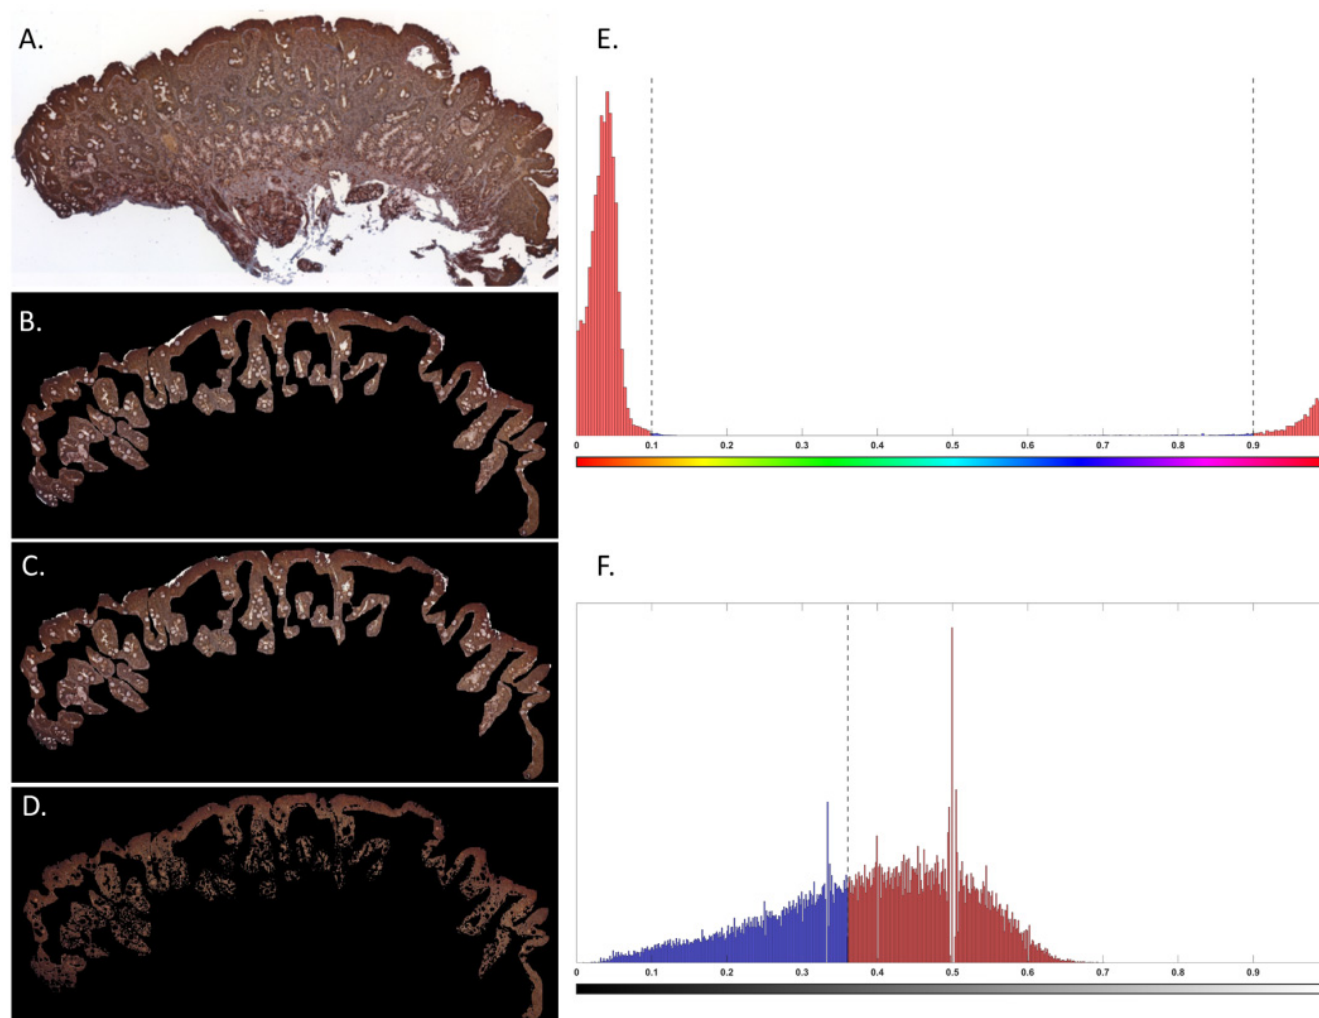

**Figure S1.** The process for measuring the saturation and stained area of iron transporter proteins in enterocytes as exemplified by ferroportin staining in a patient with subtotal villous atrophy and anemia. (A) The scanned ferroportin stained section. (B) The epithelial layer free hand selected using Fiji Image J program. (C) The red color chosen from the hue channel. (D) The saturation thresholded to show the area of the ferroportin staining. (E) A histogram of the hue channel, where the red color is chosen. (F) A histogram of the saturation channel.

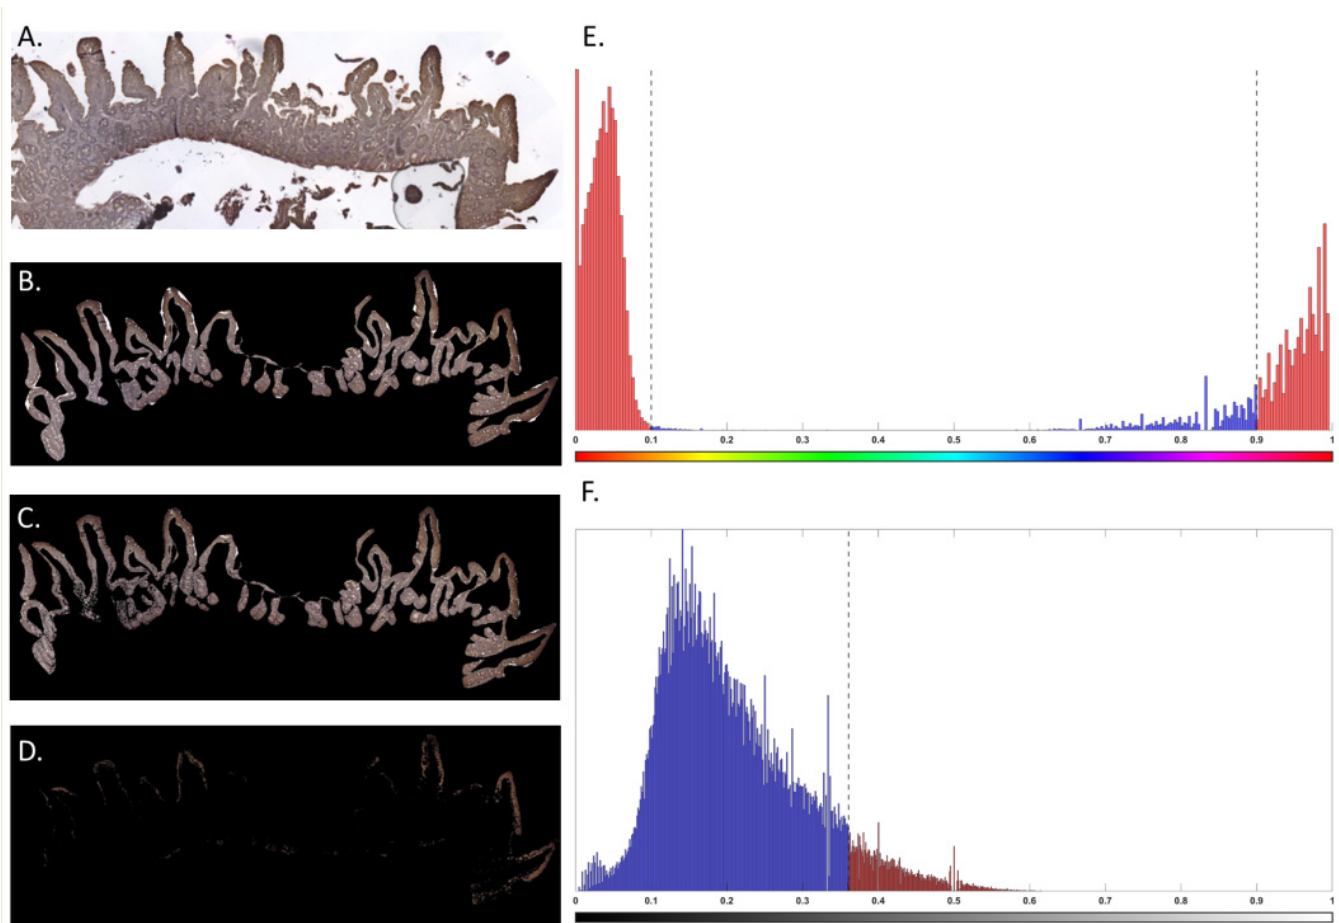

**Figure S2.** The process for measuring the saturation and stained area of iron transporter proteins in enterocytes as exemplified by ferroportin staining in a control child with anemia. **(A)** The scanned ferroportin stained section. **(B)** The epithelial layer free hand selected using Fiji Image J program. **(C)** The red color chosen from the hue channel. **(D)** The saturation thresholded to show the area of the ferroportin staining. **(E)** A histogram of the hue channel, where the red color is chosen. **(F)** A histogram of the saturation channel.
